# Supplementary material for: Distinct Gut Microbiome Induced by Different Feeding Regimes in Weaned Piglets
Source: MDPI journal article supplement (doi:10.3390/genes14010049), 2022-12-23
Supplement: s1 [file s1]

**Table S1.** Statistics of sequencing data

| Sample | Raw data (Mb) | Clean data (Mb) | Data utilization ratio (%) | Raw reads | Clean reads | Read utilization ratio (%) | Connect tags | Connect ratio (%) | Clean tags | OTUs |
|--------|---------------|-----------------|----------------------------|-----------|-------------|----------------------------|--------------|-------------------|------------|------|
| FF1    | 39.94         | 37.5            | 93.9                       | 72063     | 69221       | 96.06                      | 69104        | 99.83             | 49495      | 386  |
| FF2    | 39.82         | 37.5            | 94.16                      | 72003     | 69190       | 96.09                      | 69050        | 99.8              | 50948      | 401  |
| FF3    | 39.84         | 37.5            | 94.13                      | 72151     | 69411       | 96.2                       | 69296        | 99.83             | 50319      | 413  |
| FF4    | 39.77         | 37.5            | 94.29                      | 72280     | 69583       | 96.27                      | 69445        | 99.8              | 51491      | 416  |
| FF5    | 39.65         | 37.5            | 94.57                      | 72227     | 69682       | 96.48                      | 69552        | 99.81             | 51365      | 404  |
| FF6    | 39.81         | 37.5            | 94.2                       | 71588     | 68850       | 96.18                      | 68743        | 99.84             | 49087      | 386  |
| BF1    | 39.71         | 37.5            | 94.44                      | 71517     | 68904       | 96.35                      | 68696        | 99.7              | 47777      | 285  |
| BF2    | 40.15         | 37.5            | 93.39                      | 71792     | 68560       | 95.5                       | 68376        | 99.73             | 48772      | 287  |
| BF3    | 40.24         | 37.5            | 93.2                       | 72088     | 68784       | 95.42                      | 68602        | 99.74             | 48005      | 287  |
| BF4    | 40.05         | 37.5            | 93.63                      | 71881     | 68740       | 95.63                      | 68589        | 99.78             | 49136      | 274  |
| BF5    | 40.1          | 37.5            | 93.53                      | 72085     | 68891       | 95.57                      | 68737        | 99.78             | 50702      | 260  |
| BF6    | 40.13         | 37.5            | 93.46                      | 72383     | 69153       | 95.54                      | 69027        | 99.82             | 50600      | 281  |
